# Supplementary material
Source: HighWire-hosted journal article supplement (https://sit.bmj.com/highwire/filestream/397/field_highwire_adjunct_files/0/bmjsit-2020-000071supp001_data_supplement.pdf)
Supplement: bmjsit-2020-000071supp001_data_supplement.pdf [file bmjsit-2020-000071supp001_data_supplement.pdf]

**Table S1: Method used to convert International Prostate Severity Score (IPSS) to a utility value dependent on scores for obstructive and irritative symptoms, as suggested by Kok et al [16].****Table S1A**

| Domain                           | Summary Score | Symptoms Level      |
|----------------------------------|---------------|---------------------|
| <b>Obstructive</b>               |               |                     |
| Seldom/never                     | ≤ 4           | Obstructive Score 1 |
| About half of the time/sometimes | ≥ 5 and ≤ 16  | Obstructive Score 2 |
| Almost Always                    | ≥ 17          | Obstructive Score 3 |
| <b>Irritative</b>                |               |                     |
| Seldom/never                     | ≤ 3           | Irritative Score 1  |
| About half of the time/sometimes | ≥ 4 and ≤ 9   | Irritative Score 2  |
| Almost Always                    | ≥ 10          | Irritative Score 3  |

**Table S1B\***

| Irritative Score (Symptoms Level) | Obstructive Score (Symptoms Level) |             |             |
|-----------------------------------|------------------------------------|-------------|-------------|
|                                   | 1                                  | 2           | 3           |
| 1                                 | 1.00                               | 0.97 (0.11) | 0.95 (0.09) |
| 2                                 | 0.97 (0.10)                        | 0.94 (0.12) | 0.92 (0.11) |
| 3                                 | 0.92 (0.15)                        | 0.90 (0.14) | 0.87 (0.14) |

\*Data expressed as Mean (Standard Deviation)
